# Supplementary material for: Trends and Disparities in Sepsis and Acute Stroke-Related Mortality Rates among Adults in the United States (1999-2023): A CDC Wonder Analysis
Source: Research Square preprint supplement (doi:10.21203/rs.3.rs-7771530/v1), 2025-10-14
Supplement: Supplementary file 1 [file 9831e08bcf8dcb3d6dbf9ead.docx]

**SEPSIS AND STROKE SUPPLEMENTARY TABLES**

**Table 1.Demographic Characteristics of Age-Adjusted Mortality Rates of Sepsis and Acute Stroke events in the United States from 1999 to 2020:**

| **Variable** | **Deaths** | **Population** | **AAMR(95% CI)** |
| --- | --- | --- | --- |
| **Overall** | 177836 | 5409649211 | 3.06 |
| **Sex** |  |  |  |
| Female | 92081 | 2775657334 | 2.74 |
| Male | 85755 | 2633991877 | 3.52 |
| **Race/Ethnicity** |  |  |  |
| American Indian | 1110 | 42536402 | 3.58 |
| NH white | 117892 | 3644401586 | 2.55 |
| NH black | 38064 | 659572487 | 7.37 |
| Hispanic/Latino | 13968 | N/A | N/A |
| Asian/Pacific Islander | 6281 | 287111166 | 2.99 |
| **Census Region** |  |  |  |
| Northeast | 32630 | 989744746 | 2.85 |
| Midwest | 34853 | 1174560460 | 2.65 |
| South | 76375 | 1998181533 | 3.63 |
| West | 33978 | 1247162472 | 2.76 |
| **Urbanization** |  |  |  |
| Urban | 145866 | 4594969437 | 3.06 |
| Rural | 31970 | 814672274 | 3.17 |

Abbreviations: AAMR: age-adjusted mortality rate; CI: confidence interval; NH: non-Hispanic **______________________________________**

**Table 2. Demographic Characteristics of Age-Adjusted Mortality Rates of Sepsis and Acute Stroke events in the United States from 2021 to 2023 :**

| **Variable** | **Deaths** | **Population** | **AAMR(95% CI)** |
| --- | --- | --- | --- |
| **Overall** | 31963 | 820593659 | 3.18 |
| **Sex** |  |  |  |
| Female | 15036 | 417005628 | 2.74 |
| Male | 16927 | 403588031 | 3.81 |
| **Race/Ethnicity** |  |  |  |
| American Indian | 251 | 5910254 | 4 |
| NH white | 19876 | 501405551 | 2.75 |
| NH black | 6712 | 101300713 | 6.82 |
| Hispanic/Latino | 3371 | 144707532 | 3.27 |
| Asian/Pacific Islander | 1410 | 50605818 | 2.79 |
| **Census Region** |  |  |  |
| Northeast | 4825 | 142729481 | 2.6 |
| Midwest | 5594 | 168988630 | 2.66 |
| South | 14574 | 315075525 | 3.85 |
| West | 6970 | 193800023 | 3.14 |
| **Urbanization** |  |  |  |
| Urban | N/A | N/A | N/A |
| Rural | N/A | N/A | N/A |

Abbreviations: AAMR: age-adjusted mortality rate; CI: confidence interval; NH: non-Hispanic

**_______________________________________**

**Table 3. Annual Percentage Changes (APCs) of Sepsis and Acute Stroke Events in the United States Population from 1999 to 2023:**

| **Cohort** | **Segment** | **Lower Endpoint** | **Upper Endpoint** | **APC** | **Lower CI** | **Upper CI** | **Test Statistic (t)** | **Prob > |t|** |
| --- | --- | --- | --- | --- | --- | --- | --- | --- |
| **Overall Mortality** |  |  |  |  |  |  |  |  |
| overall - 3 Joinpoints | 1 | 1999 | 2010 | -5.1191* | -5.4339 | -4.8032 | -33.9138 | < 0.000001 |
| overall - 3 Joinpoints | 2 | 2010 | 2018 | 0.5016 | -0.1931 | 1.2011 | 1.5471 | 0.144144 |
| overall - 3 Joinpoints | 3 | 2018 | 2021 | 7.4371* | 2.3347 | 12.794 | 3.1621 | 0.006924 |
| overall - 3 Joinpoints | 4 | 2021 | 2023 | -3.9577 | -8.0831 | 0.3529 | -1.9727 | 0.06861 |
| **Gender** |  |  |  |  |  |  |  |  |
| Female - 1 Joinpoint | 1 | 1999 | 2012 | -4.8158* | -5.3817 | -4.2464 | -17.2626 | < 0.000001 |
| Female - 1 Joinpoint | 2 | 2012 | 2023 | 2.2601* | 1.4322 | 3.0948 | 5.7349 | 0.000013 |
| Male - 3 Joinpoints | 1 | 1999 | 2010 | -5.2821* | -5.7256 | -4.8366 | -24.8004 | < 0.000001 |
| Male - 3 Joinpoints | 2 | 2010 | 2018 | 1.1228* | 0.1842 | 2.0702 | 2.568 | 0.022322 |
| Male - 3 Joinpoints | 3 | 2018 | 2021 | 7.2909* | 0.6889 | 14.3259 | 2.3766 | 0.03228 |
| Male - 3 Joinpoints | 4 | 2021 | 2023 | -4.1087 | -9.4902 | 1.5927 | -1.558 | 0.141546 |
| **AGE** |  |  |  |  |  |  |  |  |
| Young adults - 0 Joinpoints | 1 | 1999 | 2023 | 2.8605* | 1.3515 | 4.392 | 3.9477 | 0.00064 |
| Early middle aged adults - 3 Joinpoints | 1 | 1999 | 2007 | -2.2084* | -3.9919 | -0.3918 | -2.6023 | 0.020886 |
| Early middle aged adults - 3 Joinpoints | 2 | 2007 | 2018 | 1.9163* | 0.5135 | 3.3386 | 2.9373 | 0.010814 |
| Early middle aged adults - 3 Joinpoints | 3 | 2018 | 2021 | 15.919* | 0.2593 | 34.0248 | 2.1831 | 0.046555 |
| Early middle aged adults - 3 Joinpoints | 4 | 2021 | 2023 | -8.9247 | -19.584 | 3.1479 | -1.6107 | 0.129543 |
| Middle aged adults - 3 Joinpoints | 1 | 1999 | 2011 | -4.3403* | -4.6446 | -4.0351 | -29.8768 | < 0.000001 |
| Middle aged adults - 3 Joinpoints | 2 | 2011 | 2018 | 2.1144* | 1.2581 | 2.9779 | 5.329 | 0.000106 |
| Middle aged adults - 3 Joinpoints | 3 | 2018 | 2021 | 9.9832* | 5.1883 | 14.9966 | 4.5786 | 0.00043 |
| Middle aged adults - 3 Joinpoints | 4 | 2021 | 2023 | -3.9285* | -7.5857 | -0.1267 | -2.2148 | 0.043862 |
| Older adults - 1 Joinpoint | 1 | 1999 | 2011 | -5.6543* | -6.127 | -5.1793 | -24.1752 | < 0.000001 |
| Older adults - 1 Joinpoint | 2 | 2011 | 2023 | 0.7526* | 0.2182 | 1.2899 | 2.9407 | 0.008084 |
| **CENSUS** |  |  |  |  |  |  |  |  |
| Census Region 1: Northeast - 2 Joinpoints | 1 | 1999 | 2010 | -5.4752* | -6.1273 | -4.8186 | -17.1624 | < 0.000001 |
| Census Region 1: Northeast - 2 Joinpoints | 2 | 2010 | 2019 | -0.2498 | -1.4752 | 0.9908 | -0.4269 | 0.674775 |
| Census Region 1: Northeast - 2 Joinpoints | 3 | 2019 | 2023 | 3.6208* | 0.0208 | 7.3503 | 2.1222 | 0.048809 |
| Census Region 2: Midwest - 1 Joinpoint | 1 | 1999 | 2012 | -4.6761* | -5.329 | -4.0186 | -14.5331 | < 0.000001 |
| Census Region 2: Midwest - 1 Joinpoint | 2 | 2012 | 2023 | 2.2527* | 1.3102 | 3.2039 | 5.0184 | 0.000066 |
| Census Region 3: South - 3 Joinpoints | 1 | 1999 | 2011 | -5.4517* | -5.7132 | -5.1895 | -43.4211 | < 0.000001 |
| Census Region 3: South - 3 Joinpoints | 2 | 2011 | 2018 | 1.6417* | 0.8778 | 2.4114 | 4.6296 | 0.00039 |
| Census Region 3: South - 3 Joinpoints | 3 | 2018 | 2021 | 7.8988* | 3.3165 | 12.6843 | 3.7573 | 0.002122 |
| Census Region 3: South - 3 Joinpoints | 4 | 2021 | 2023 | -5.6450* | -9.3601 | -1.7776 | -3.1024 | 0.007795 |
| Census Region 4: West - 1 Joinpoint | 1 | 1999 | 2011 | -3.7160* | -4.6994 | -2.7224 | -7.6945 | < 0.000001 |
| Census Region 4: West - 1 Joinpoint | 2 | 2011 | 2023 | 2.3263* | 1.4319 | 3.2286 | 5.464 | 0.000024 |
| **Urbanization** |  |  |  |  |  |  |  |  |
| Metropolitan - 1 Joinpoint | 1 | 1999 | 2012 | -4.7981* | -5.2617 | -4.3322 | -21.2506 | < 0.000001 |
| Metropolitan - 1 Joinpoint | 2 | 2012 | 2020 | 2.0261* | 1.0841 | 2.9769 | 4.5624 | 0.000276 |
| Non- Metropolitan - 1 Joinpoint | 1 | 1999 | 2011 | -4.2115* | -4.7853 | -3.6342 | -15.1086 | < 0.000001 |
| Non- Metropolitan - 1 Joinpoint | 2 | 2011 | 2020 | 2.7304* | 1.7349 | 3.7356 | 5.8367 | 0.00002 |
| **Race/Ethnicity** |  |  |  |  |  |  |  |  |
| AMERICANS - 0 Joinpoints | 1 | 1999 | 2023 | 0.7316 | -0.1141 | 1.5844 | 1.7886 | 0.086868 |
| Asians - 2 Joinpoints | 1 | 1999 | 2018 | -3.5685* | -4.1268 | -3.0069 | -13.2026 | < 0.000001 |
| Asians - 2 Joinpoints | 2 | 2018 | 2021 | 11.58 | -4.532 | 30.4112 | 1.4824 | 0.156543 |
| Asians - 2 Joinpoints | 3 | 2021 | 2023 | -12.130 | -24.337 | 2.045 | -1.8242 | 0.085742 |
| Blacks or Africans - 3 Joinpoints | 1 | 1999 | 2012 | -5.9457* | -6.3451 | -5.5446 | -30.8964 | < 0.000001 |
| Blacks or Africans - 3 Joinpoints | 2 | 2012 | 2018 | -1.1179 | -3.0317 | 0.8336 | -1.2337 | 0.237621 |
| Blacks or Africans - 3 Joinpoints | 3 | 2018 | 2021 | 8.2091* | 0.0029 | 17.0888 | 2.1456 | 0.049927 |
| Blacks or Africans - 3 Joinpoints | 4 | 2021 | 2023 | -1.6847 | -8.5565 | 5.7034 | -0.5029 | 0.622825 |
| WHITES - 1 Joinpoint | 1 | 1999 | 2011 | -4.9076* | -5.4618 | -4.3501 | -17.9568 | < 0.000001 |
| WHITES - 1 Joinpoint | 2 | 2011 | 2023 | 2.5091* | 1.9168 | 3.1049 | 8.9203 | < 0.000001 |
| Hispanic or Latino | 1 | 1999 | 2012 | -4.4631* | -5.6284 | -3.2833 | -7.7599 | < 0.000001 |
| Hispanic or Latino | 2 | 2012 | 2023 | 1.4856* | 0.2615 | 2.7246 | 2.5349 | 0.019704 |

Abbreviations: APC, annual percent change; CI, confidence interval

* Indicates that the APC significantly differs from zero at the alpha = 0.05 level.

**Table 4. Sepsis and Acute Stroke events related Age-Adjusted Mortality Rates per 1,000,000 in the United States, 1999 – 2023**

**4A. Overall Mortality, Sex, Races:**

| **Year** | **Overall Mortality** | **Female** | **Male** | **Hispanic or Latino** | **NH American Indian or Alaska Native** | **NH Asian** | **NH Black** | **NH White** |
| --- | --- | --- | --- | --- | --- | --- | --- | --- |
| 1999 | 4.59 | 4.09 | 5.35 | 4.77 | 4.84 | 4.95 | 12.45 | 3.78 |
| 2000 | 4.32 | 3.85 | 5.04 | 4.81 | 3.62 | 4.24 | 11.77 | 3.55 |
| 2001 | 4.09 | 3.72 | 4.63 | 4.44 | 3.89 | 4.11 | 11.3 | 3.34 |
| 2002 | 3.98 | 3.59 | 4.54 | 4.37 | 3.13 | 3.87 | 11.05 | 3.23 |
| 2003 | 3.8 | 3.46 | 4.3 | 4.54 | 2.59 | 4.39 | 9.99 | 3.1 |
| 2004 | 3.56 | 3.21 | 4.01 | 4.07 | 3.41 | 3.68 | 9.76 | 2.87 |
| 2005 | 3.43 | 3.09 | 3.96 | 4.09 | 3.74 | 4.17 | 9 | 2.77 |
| 2006 | 3.2 | 2.9 | 3.66 | 3.64 | 4.02 | 3.55 | 8.72 | 2.59 |
| 2007 | 3 | 2.62 | 3.5 | 3.37 | 3.55 | 3.11 | 8.22 | 2.4 |
| 2008 | 2.87 | 2.56 | 3.25 | 3.26 | 3.15 | 2.91 | 7.4 | 2.35 |
| 2009 | 2.71 | 2.45 | 3.03 | 2.98 | 3.78 | 3.16 | 6.7 | 2.22 |
| 2010 | 2.63 | 2.3 | 3.02 | 3.07 | 3.19 | 3.13 | 6.43 | 2.13 |
| 2011 | 2.61 | 2.35 | 2.97 | 3.04 | 3.22 | 2.78 | 6.07 | 2.18 |
| 2012 | 2.52 | 2.26 | 2.84 | 2.82 | 3.25 | 2.65 | 5.69 | 2.09 |
| 2013 | 2.54 | 2.23 | 2.89 | 2.65 | 3.16 | 2.76 | 5.53 | 2.12 |
| 2014 | 2.57 | 2.24 | 3.01 | 2.85 | 4.03 | 2.51 | 5.61 | 2.17 |
| 2015 | 2.7 | 2.35 | 3.24 | 3.3 | 2.98 | 2.62 | 5.62 | 2.27 |
| 2016 | 2.75 | 2.42 | 3.19 | 2.94 | 4.2 | 2.56 | 5.8 | 2.35 |
| 2017 | 2.76 | 2.37 | 3.27 | 2.82 | 4.28 | 2.4 | 5.68 | 2.36 |
| 2018 | 2.75 | 2.38 | 3.24 | 2.77 | 3.39 | 2.47 | 5.52 | 2.38 |
| 2019 | 2.67 | 2.27 | 3.14 | 2.75 | 3.64 | 2.42 | 5.31 | 2.29 |
| 2020 | 3.05 | 2.56 | 3.69 | 3.39 | 5 | 2.83 | 6.28 | 2.58 |
| 2021 | 3.39 | 2.87 | 3.99 | 3.34 | 3.98 | 3.25 | 6.98 | 2.89 |
| 2022 | 3.27 | 2.78 | 3.85 | 3.37 | 4.08 | 2.75 | 6.94 | 2.75 |
| 2023 | 3.04 | 2.62 | 3.6 | 3.07 | 3.99 | 2.47 | 6.54 | 2.61 |

**4B. Census Region:**

| **Year** | **Northeast** | **Midwest** | **South** | **West** |
| --- | --- | --- | --- | --- |
| 1999 | 4.27 | 4.18 | 5.6 | 3.68 |
| 2000 | 4.31 | 3.7 | 5.33 | 3.29 |
| 2001 | 3.95 | 3.44 | 5.01 | 3.43 |
| 2002 | 3.84 | 3.4 | 4.88 | 3.22 |
| 2003 | 3.57 | 3.21 | 4.59 | 3.34 |
| 2004 | 3.37 | 3.08 | 4.19 | 3.18 |
| 2005 | 3.35 | 3 | 4.03 | 3 |
| 2006 | 3.16 | 2.8 | 3.76 | 2.82 |
| 2007 | 2.76 | 2.59 | 3.61 | 2.65 |
| 2008 | 2.66 | 2.57 | 3.36 | 2.53 |
| 2009 | 2.42 | 2.38 | 3.21 | 2.45 |
| 2010 | 2.36 | 2.31 | 3.02 | 2.48 |
| 2011 | 2.45 | 2.31 | 3.01 | 2.43 |
| 2012 | 2.34 | 2.09 | 2.92 | 2.4 |
| 2013 | 2.39 | 2.21 | 2.85 | 2.41 |
| 2014 | 2.33 | 2.2 | 3 | 2.4 |
| 2015 | 2.5 | 2.32 | 3.12 | 2.6 |
| 2016 | 2.38 | 2.24 | 3.2 | 2.73 |
| 2017 | 2.38 | 2.43 | 3.2 | 2.69 |
| 2018 | 2.33 | 2.33 | 3.35 | 2.56 |
| 2019 | 2.3 | 2.27 | 3.19 | 2.46 |
| 2020 | 2.45 | 2.66 | 3.69 | 2.84 |
| 2021 | 2.49 | 2.9 | 4.18 | 3.19 |
| 2022 | 2.78 | 2.56 | 3.84 | 3.26 |
| 2023 | 2.59 | 2.56 | 3.6 | 2.93 |

**4C.Age and Urbanization:**

| **Year** | **Young adults** | **Early Middle Aged Adults** | **Middle Aged Adults** | **Older Adults** | **Metropolitan** | **Non-metropolitan** |
| --- | --- | --- | --- | --- | --- | --- |
| 1999 | 0.05 | 0.62 | 6.69 | 39.52 | 4.62 | 4.46 |
| 2000 | 0.05 | 0.62 | 6.62 | 36.19 | 4.42 | 3.97 |
| 2001 | 0.05 | 0.62 | 6.32 | 33.98 | 4.13 | 3.84 |
| 2002 | 0.05 | 0.62 | 6.06 | 33.08 | 4.02 | 3.87 |
| 2003 | 0.1 | 0.62 | 5.73 | 31.45 | 3.85 | 3.63 |
| 2004 | 0.05 | 0.62 | 5.4 | 29.28 | 3.58 | 3.4 |
| 2005 | 0.05 | 0.63 | 5.37 | 27.68 | 3.46 | 3.37 |
| 2006 | 0.05 | 0.52 | 5.07 | 26.01 | 3.24 | 3.07 |
| 2007 | 0.05 | 0.53 | 4.75 | 24.14 | 3.02 | 3.03 |
| 2008 | 0.05 | 0.57 | 4.47 | 23 | 2.87 | 2.97 |
| 2009 | 0.05 | 0.57 | 4.38 | 21.15 | 2.69 | 2.83 |
| 2010 | 0.05 | 0.57 | 4.14 | 20.72 | 2.62 | 2.61 |
| 2011 | 0.05 | 0.57 | 4.18 | 20.28 | 2.61 | 2.67 |
| 2012 | 0.05 | 0.57 | 4.04 | 19.54 | 2.47 | 2.59 |
| 2013 | 0.05 | 0.62 | 3.99 | 19.58 | 2.49 | 2.66 |
| 2014 | 0.05 | 0.57 | 4.34 | 19.35 | 2.55 | 2.69 |
| 2015 | 0.05 | 0.66 | 4.48 | 20.25 | 2.66 | 2.88 |
| 2016 | 0.1 | 0.72 | 4.57 | 20.21 | 2.65 | 3.14 |
| 2017 | 0.05 | 0.67 | 4.71 | 20.43 | 2.69 | 3.04 |
| 2018 | 0.1 | 0.67 | 4.68 | 20.09 | 2.68 | 2.99 |
| 2019 | 0.1 | 0.72 | 4.72 | 18.82 | 2.58 | 2.99 |
| 2020 | 0.1 | 0.85 | 5.6 | 20.82 | 3 | 3.38 |
| 2021 | 0.1 | 1.1 | 6.18 | 22.51 | N/A | N/A |
| 2022 | 0.1 | 0.96 | 6.24 | 21.47 | N/A | N/A |
| 2023 | 0.1 | 0.86 | 5.58 | 20.7 | N/A | N/A |

**Table 5. Sepsis and Acute Stroke events Related Age-Adjusted Mortality Rates per 1,000,000, Stratified by States in the United States, 1999 – 2020:**

| **States** | **Age Adjusted Rate** | **Age Adjusted Rate Lower 95% Confidence Interval** | **Age Adjusted Rate Upper 95% Confidence Interval** |
| --- | --- | --- | --- |
| Maine | 0.48 | 0.31 | 0.72 |
| Rhode Island | 1.63 | 1.24 | 2.11 |
| New Hampshire | 1.7 | 1.33 | 2.13 |
| Arizona | 1.72 | 1.54 | 1.89 |
| New Mexico | 1.84 | 1.5 | 2.18 |
| Hawaii | 1.86 | 1.49 | 2.29 |
| Connecticut | 1.95 | 1.69 | 2.2 |
| Wyoming | 2.11 | 1.46 | 2.95 |
| Iowa | 2.12 | 1.83 | 2.41 |
| Vermont | 2.13 | 1.55 | 2.85 |
| Montana | 2.16 | 1.7 | 2.72 |
| Oregon | 2.17 | 1.92 | 2.43 |
| Wisconsin | 2.41 | 2.18 | 2.64 |
| Massachusetts | 2.47 | 2.26 | 2.68 |
| Idaho | 2.49 | 2.05 | 2.92 |
| Missouri | 2.49 | 2.26 | 2.71 |
| New York | 2.51 | 2.39 | 2.64 |
| North Dakota | 2.54 | 1.91 | 3.31 |
| Utah | 2.54 | 2.16 | 2.92 |
| Illinois | 2.56 | 2.4 | 2.72 |
| Ohio | 2.6 | 2.43 | 2.77 |
| South Dakota | 2.64 | 2.05 | 3.35 |
| Kansas | 2.69 | 2.34 | 3.05 |
| Alaska | 2.7 | 1.96 | 3.64 |
| Virginia | 2.74 | 2.53 | 2.94 |
| Nebraska | 2.83 | 2.38 | 3.27 |
| Florida | 2.86 | 2.74 | 2.98 |
| Michigan | 2.87 | 2.68 | 3.06 |
| North Carolina | 2.95 | 2.75 | 3.14 |
| Pennsylvania | 2.96 | 2.79 | 3.13 |
| Indiana | 2.98 | 2.74 | 3.23 |
| Colorado | 3.01 | 2.73 | 3.28 |
| Minnesota | 3.04 | 2.77 | 3.3 |
| Delaware | 3.15 | 2.54 | 3.77 |
| West Virginia | 3.26 | 2.79 | 3.73 |
| Washington | 3.37 | 3.12 | 3.62 |
| New Jersey | 3.41 | 3.19 | 3.62 |
| Nevada | 3.5 | 3.11 | 3.89 |
| Georgia | 3.56 | 3.34 | 3.78 |
| California | 3.75 | 3.63 | 3.87 |
| Alabama | 3.97 | 3.65 | 4.29 |
| Texas | 4.07 | 3.92 | 4.22 |
| Tennessee | 4.12 | 3.84 | 4.4 |
| South Carolina | 4.4 | 4.07 | 4.73 |
| Arkansas | 4.83 | 4.37 | 5.3 |
| Louisiana | 4.83 | 4.45 | 5.22 |
| Maryland | 5.12 | 4.78 | 5.45 |
| Kentucky | 5.98 | 5.56 | 6.41 |
| Oklahoma | 6.04 | 5.58 | 6.5 |
| Mississippi | 7.04 | 6.47 | 7.62 |
| District of Columbia | 7.86 | 6.47 | 9.26 |

**Table 6. Sepsis and Acute Stroke events Related deaths, Stratified by Overall Mortality, sex, races in the United States, 1999 – 2023:**

| **Year** | **Overall Mortality** | **Female** | **Male** | **Hispanic or Latino** | **NH American Indian or Alaska Native** | **NH Asian** | **NH Black** | **NH White** |
| --- | --- | --- | --- | --- | --- | --- | --- | --- |
| 1999 | 9858 | 5396 | 4462 | 484 | 36 | 220 | 2188 | 6897 |
| 2000 | 9384 | 5108 | 4276 | 496 | 33 | 201 | 2107 | 6512 |
| 2001 | 9008 | 4976 | 4032 | 507 | 36 | 213 | 2058 | 6164 |
| 2002 | 8887 | 4856 | 4031 | 516 | 34 | 220 | 2043 | 6052 |
| 2003 | 8648 | 4703 | 3945 | 576 | 27 | 256 | 1896 | 5874 |
| 2004 | 8198 | 4457 | 3741 | 532 | 35 | 231 | 1886 | 5499 |
| 2005 | 8103 | 4293 | 3810 | 584 | 39 | 280 | 1802 | 5371 |
| 2006 | 7705 | 4107 | 3598 | 544 | 45 | 255 | 1777 | 5070 |
| 2007 | 7341 | 3812 | 3529 | 529 | 43 | 241 | 1709 | 4810 |
| 2008 | 7161 | 3805 | 3356 | 532 | 37 | 232 | 1602 | 4738 |
| 2009 | 6881 | 3643 | 3238 | 536 | 48 | 267 | 1502 | 4515 |
| 2010 | 6781 | 3507 | 3274 | 557 | 39 | 274 | 1485 | 4413 |
| 2011 | 6956 | 3616 | 3340 | 614 | 43 | 267 | 1447 | 4566 |
| 2012 | 6869 | 3587 | 3282 | 586 | 48 | 281 | 1396 | 4539 |
| 2013 | 7026 | 3577 | 3449 | 582 | 47 | 304 | 1414 | 4653 |
| 2014 | 7358 | 3680 | 3678 | 666 | 67 | 295 | 1490 | 4802 |
| 2015 | 7943 | 3870 | 4073 | 822 | 51 | 332 | 1546 | 5152 |
| 2016 | 8176 | 4056 | 4120 | 775 | 72 | 339 | 1632 | 5326 |
| 2017 | 8441 | 4100 | 4341 | 777 | 81 | 342 | 1673 | 5545 |
| 2018 | 8611 | 4175 | 4436 | 808 | 67 | 375 | 1678 | 5652 |
| 2019 | 8521 | 4086 | 4435 | 850 | 75 | 382 | 1685 | 5512 |
| 2020 | 9980 | 4671 | 5309 | 1095 | 107 | 474 | 2048 | 6230 |
| 2021 | 10814 | 5053 | 5761 | 1113 | 81 | 515 | 2237 | 6746 |
| 2022 | 10875 | 5157 | 5718 | 1164 | 86 | 461 | 2288 | 6763 |
| 2023 | 10274 | 4826 | 5448 | 1094 | 84 | 434 | 2187 | 6367 |

NH= non-Hispanic; N/A=not available (unreliable or suppressed)
